# Supplementary material for: Study of Body Composition and Motor Competence in children from the 1st Basic Cycle and their relationship with school performance
Source: Research Square preprint supplement (doi:10.21203/rs.3.rs-5497811/v1), 2025-04-10
Supplement: Supplementary file 1 [file 4eb504b2bf0d4aa001a3226e.docx]

| **Variables** | **1st Year  (N = 51)** | | **2nd Year  (N = 59)** | | **3rd Year  (N = 75)** | | | **4th Year  (N = 87)** | | | |
| --- | --- | --- | --- | --- | --- | --- | --- | --- | --- | --- | --- |
| **M**  **(N = 35)** | **F**  **(N = 16)** | **M**  **(N = 26)** | **F**  **(N = 33)** | **M**  **(N = 38)** | | **F**  **(N = 37)** | **M**  **(N = 39)** | | **F**  **(N = 48)** | |
| MM | 8.84 (±1.39) | 8.81 (±2.14) | 9.91 (±2.02) | 9.70 (±1.53) | 12.43 (±2.25) | 11.66 (±2.33) | | | 13.66 (±1.82) | | 12.31 (±1.63) |
| FM | 4.27 (±1.96) | 6.64 (±5.62) | 5.76 (±3.86) | 7.59 (±4.10) | 7.02 (±4.93) | 7.85 (±5.77) | | | 7.98 (±4.33) | | 8.39 (±3.94) |
| BMI | 16.01 (±1.29) | 17.35 (±3.86) | 16.80 (±2.98) | 17.85 (±3.16) | 17.31 (±3.27) | 17.63 (±3.65) | | | 18.22 (±2.82) | | 17.81 (±2.76) |
| %BF | 18.87 (±8.36) | 24.43 (±8.63) | 20.99 (±9.84) | 26.26 (±8.59) | 20.47 (±8.64) | 23.40 (±9.54) | | | 21.76 (±7.34) | | 24.46 (±8.73) |
| M – Male; F - Female; ± - Standard Deviation; N - Number of subjects; MM - Muscle Mass; FM - Fat Mass; BMI - Body Mass Index; %BF - Body Fat Percentage; | | | | | | | | | | | |

Supplementary table 1

Descriptive data stratified by gender (male and female) and year of schooling (1st to 4th year), regarding body composition: muscle mass (MM), fat mass (FM), body mass index (BMI) and percentage of body fat (%BF). The values shown correspond to the mean and standard deviation (±).
